# Supplementary material for: Freestanding laser-induced two dimensional heterostructures for self-contained paper-based sensors
Source: Royal Society of Chemistry journal article supplement (doi:10.1039/d2nr07157f), 2023-01-01
Supplement: d2nr07157f1.pdf [file d2nr07157f1.pdf]

## ELECTRONIC SUPPLEMENTARY INFORMATION

### Freestanding Laser-Induced Two Dimensional Heterostructures for Self-Contained Paper-based Sensors

Flavio Della Pelle<sup>a,b</sup>, Qurat Ul Ain Bukhari<sup>a,b</sup>, Rusl n Alvarez Diduk<sup>b</sup>, Annalisa Scroccarello<sup>a</sup>, Dario Compagnone<sup>a,\*</sup>, Arben Merko i<sup>b,c,\*\*</sup>

<sup>a</sup> Faculty of Bioscience and Technology for Food, Agriculture and Environment, University of Teramo, Campus "Aurelio Saliceti" Via R. Balzarini 1, 64100, Teramo, Italy

<sup>b</sup> Nanobioelectronics & Biosensors Group, Catalan Institute of Nanoscience and Nanotechnology (ICN2), CSIC and BIST, Campus UAB, Bellaterra, Barcelona, Spain.

<sup>c</sup> ICREA Instituci  Catalana de Recerca i Estudis Avan ats, Barcelona, Spain

E-mail: \* dcompagnone@unite.it (D. Compagnone); \*\* arben.merkoci@icn2.cat (A. Merko i)

## TABLE OF CONTENTS

### Supplementary Figures

|                                                                                                                                                                                                     |   |
|-----------------------------------------------------------------------------------------------------------------------------------------------------------------------------------------------------|---|
| <b>Figure S1.</b> Pictures of sensor fabrication steps                                                                                                                                              | 2 |
| <b>Figure S2.</b> Visible spectra, pictures, and micrographs of the 4 liquid phase exfoliated TMDs                                                                                                  | 3 |
| <b>Figure S3.</b> SEM micrographs and EDX mapping of the only-rGO film and sensor                                                                                                                   | 4 |
| <b>Figure S4.</b> XPS analysis for GO and rGO films                                                                                                                                                 | 5 |
| <b>Figure S5.</b> Cyclic voltammograms obtained with the full set of sensors in phosphate buffer, [Fe(CN) <sub>6</sub> ] <sup>3-/4-</sup> and [Ru(NH <sub>3</sub> ) <sub>6</sub> ] <sup>2+/3+</sup> | 6 |
| <b>Figure S6.</b> DP and CAT differential pulse voltammograms and H <sub>2</sub> O <sub>2</sub> hydrodynamic amperometry obtained with the full set of sensors.                                     | 7 |
| <b>Figure S7.</b> Differential pulse voltammetry currents of consecutive measures of DP and CAT                                                                                                     | 8 |
| <b>Figure S8.</b> Differential pulse voltammograms in SCF and amperometric curves in fetal bovine serum                                                                                             | 9 |

### Supplementary Tables

|                                                                                            |    |
|--------------------------------------------------------------------------------------------|----|
| <b>Table S1.</b> Real sample analysis data                                                 | 10 |
| <b>Table S2.</b> State of the art of TMDs combined with laser-induced graphenic structures | 11 |

## SUPPLEMENTARY FIGURES

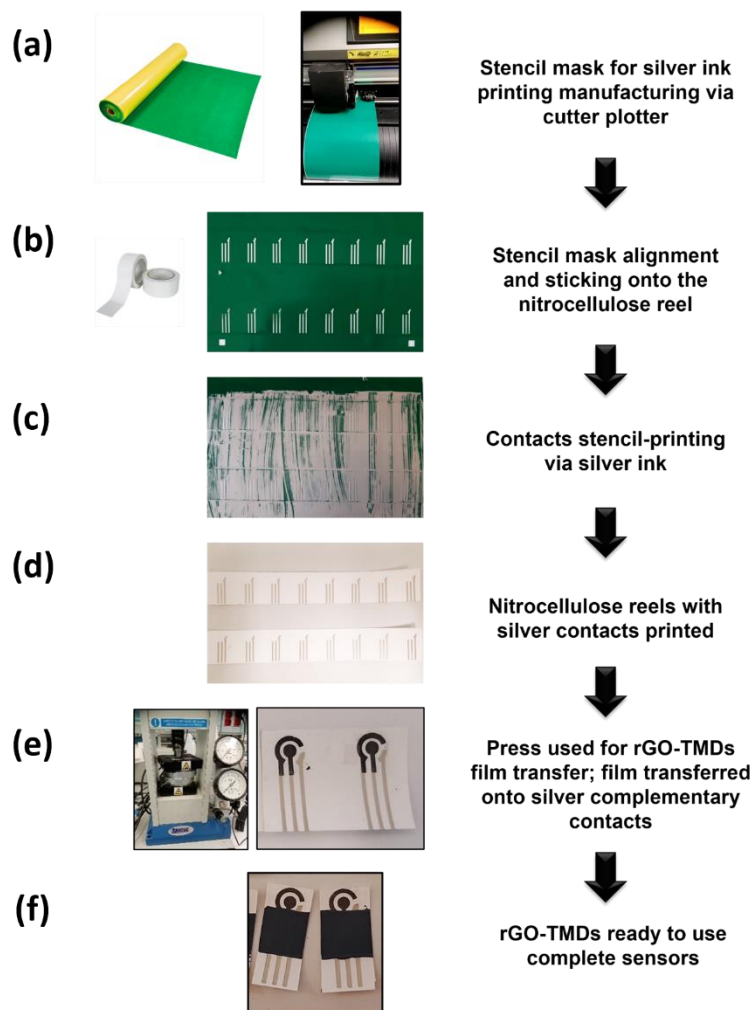

**Fig. S1** Pictures of the sensor components and their main fabrication steps. **(a)** Self-adhesive vinyl reel and its molding with cutter-plotter to obtain stencil masks for silver-ink printing of the sensor contacts. **(b)** Nitrocellulose reel and stencil mask alignment and sticking onto the same. **(c)** Stencil-printing of the sensors contacts, this step is performed by squeegeeing the silver ink onto the stencil mask adhered to the nitrocellulose reel; the mask is removed after silver contacts curing. **(d)** Nitrocellulose reels with printed silver contacts; on this substrate occurs the alignment of the complementary nanostructured film before the transfer by pressure. **(e)** Hydraulic press used for the transfer of nanomaterial films, and the film transferred onto the silver complementary contacts onto the nitrocellulose support; this step aims to create the contact between the sensing material and the potentiostat used for the measurements. **(f)** Complete sensors. The electrochemical cell is composed of the working and counter electrodes of the same material (the one of the transferred film), and a pseudo-reference electrode of silver.

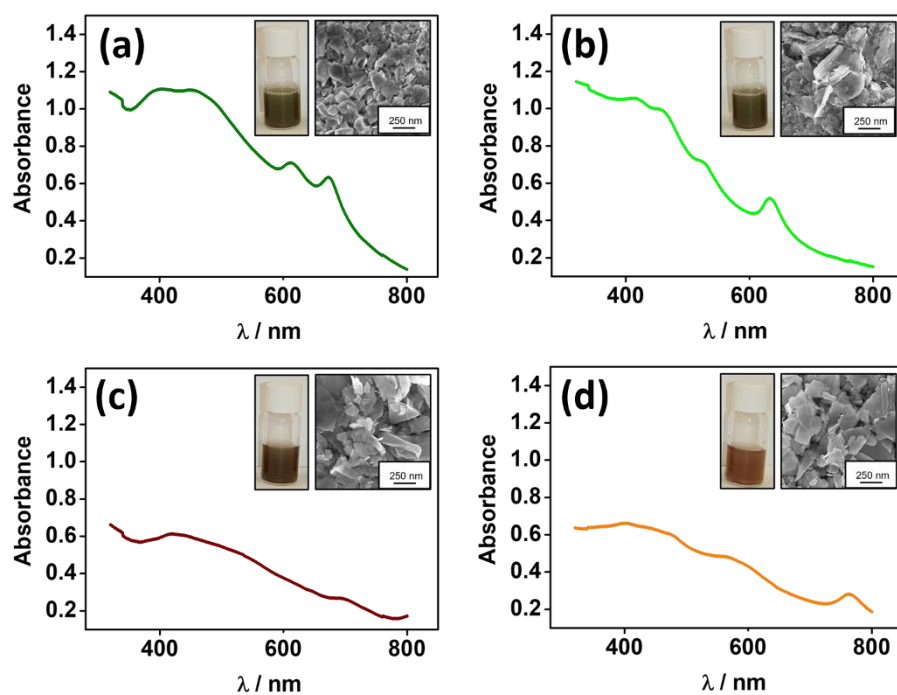

**Fig. S2** Absorbance spectra of the MoS<sub>2</sub> (a), WS<sub>2</sub> (b), MoSe<sub>2</sub> (c), WSe<sub>2</sub> (d) water dispersions. In the insets, the picture of the TMD dispersion, and the micrograph of the filtered TMD are reported

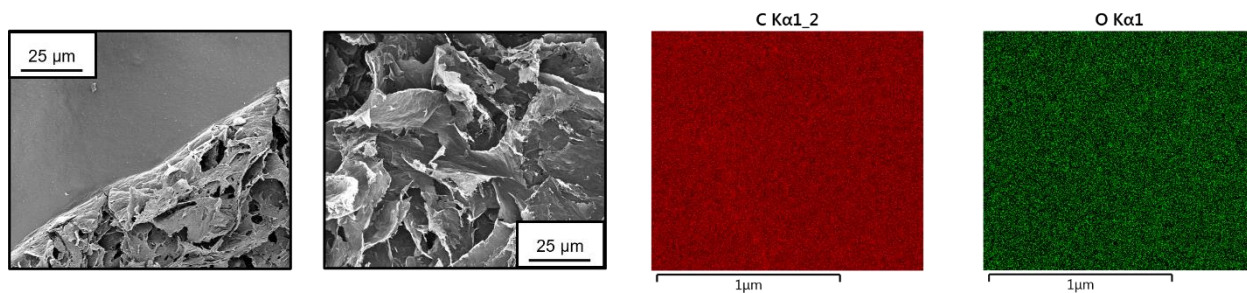

**Fig. S3** SEM micrographs performed at the GO/rGO laser treatment edge and in the rGO film transferred on nitrocellulose. EDX mapping of the rGO film for the C and O elements

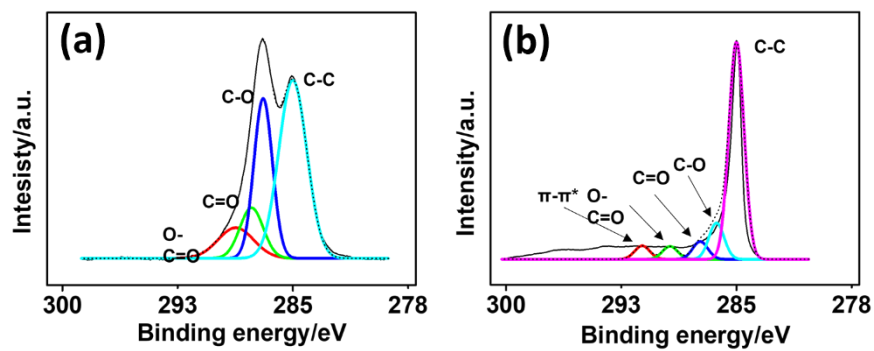

Fig. S4 XPS high-resolution spectra for the C1s of the (a) GO (before treatment) and (b) rGO (after laser treatment) films

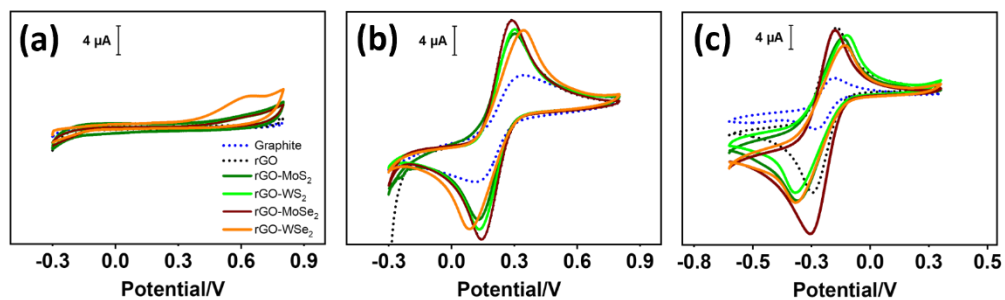

**Fig. S5** Cyclic voltammograms of (a) 0.1 M phosphate buffer + 0.1 KCl, pH 7.4 (PB), (b) 1 mM [Fe(CN)<sub>6</sub>]<sup>3-/4-</sup> and (c) 1 mM [Ru(NH<sub>3</sub>)<sub>6</sub>]<sup>2+/3+</sup> performed on a commercial graphite-SPE and with the sensors integrating the rGO and the rGO-MX<sub>2</sub> HTs. Scan rate 25 mV s<sup>-1</sup>

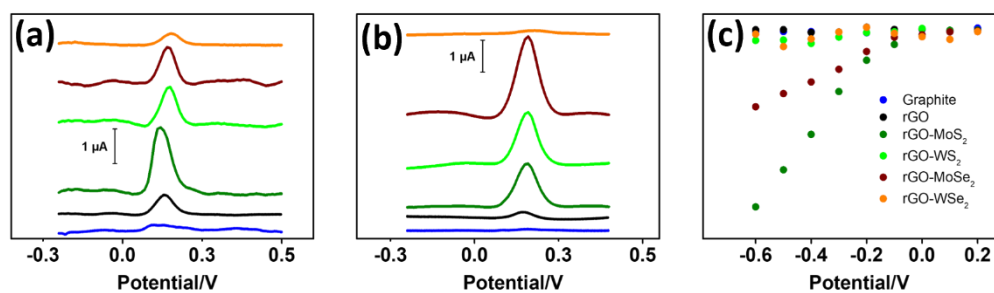

**Fig. S6** Differential pulse voltammograms obtained analyzing (a) 2.5  $\mu\text{M}$  dopamine and (b) 2.5  $\mu\text{M}$  catechin in PB with the full set of sensors (see colorimetric legend in Figure c). DPV parameters employed: pulse width 50 ms, modulation amplitude 50 mV, scan rate 25  $\text{mV s}^{-1}$ . (c) Hydrodynamic amperometry carried out with the full set of sensors for 0.1 mM  $\text{H}_2\text{O}_2$  in PB

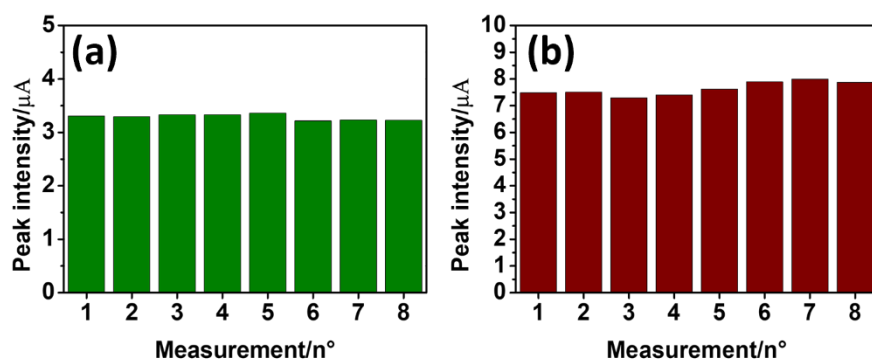

**Fig. S7** Differential pulse voltammetry peak current response obtained with consecutive measures of (a) 5  $\mu\text{M}$  DP and (b) 2  $\mu\text{M}$  CAT in PB performed on rGO-MoS<sub>2</sub> and rGO-MoSe<sub>2</sub>, respectively. DPV parameters employed: pulse width 50 ms, modulation amplitude 50 mV, scan rate 25 mV s<sup>-1</sup>

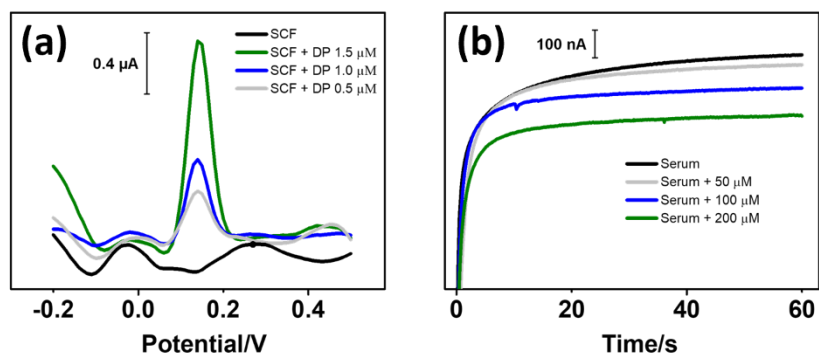

**Fig. S8** (a) Differential pulse voltammograms of SCF spiked with DP at 0.5, 1.0, and 1.5  $\mu\text{M}$  performed with the rGO-MoS<sub>2</sub> sensor. DPV parameters employed: pulse width 50 ms, modulation amplitude 50 mV, scan rate 25  $\text{mV s}^{-1}$ . (b) Amperometric curves of fetal bovine serum spiked with  $\text{H}_2\text{O}_2$  at 50, 100, and 200  $\mu\text{M}$  performed with the rGO-MoS<sub>2</sub> sensor at -0.3 V

## SUPPLEMENTARY TABLES

**Table S1.** Real sample analysis for DP (rGO-MoS<sub>2</sub>), CAT (rGO-MoSe<sub>2</sub>), and H<sub>2</sub>O<sub>2</sub> (rGO-MoS<sub>2</sub>). Results are expressed as mean value  $\pm$  standard deviation (n = 3).

| Added<br>( $\mu$ M)                        | Found<br>( $\mu$ M) | RSD<br>(%) | Recovery<br>(%) |
|--------------------------------------------|---------------------|------------|-----------------|
| <b>Dopamine in SCF</b>                     |                     |            |                 |
| 0.5                                        | 0.51 $\pm$ 0.01     | 2.3        | 101.4           |
| 1.0                                        | 1.01 $\pm$ 0.03     | 5.1        | 101.1           |
| 1.5                                        | 1.45 $\pm$ 0.04     | 5.2        | 106.7           |
| <b>Catechin in cocoa</b>                   |                     |            |                 |
| 0.5                                        | 0.52 $\pm$ 0.01     | 2.8        | 104.4           |
| 1.0                                        | 1.01 $\pm$ 0.07     | 6.7        | 100.9           |
| 1.5                                        | 1.59 $\pm$ 0.09     | 5.6        | 106.0           |
| <b>H<sub>2</sub>O<sub>2</sub> in serum</b> |                     |            |                 |
| 50                                         | 49.6 $\pm$ 3.4      | 6.8        | 99.1            |
| 100                                        | 105.0 $\pm$ 6.4     | 6.0        | 105.0           |
| 200                                        | 203.0 $\pm$ 9.3     | 4.6        | 101.5           |

**Table S2.** Components, fabrication strategy, features, and use of various TMDs combined with laser-induced graphenic structures

| TMD                                                                                                         | Graphenic material                   | Device                              | HT assembling                                                                                  | Practical use                          | Application                                                                                                     | Ref.             |
|-------------------------------------------------------------------------------------------------------------|--------------------------------------|-------------------------------------|------------------------------------------------------------------------------------------------|----------------------------------------|-----------------------------------------------------------------------------------------------------------------|------------------|
| MoS <sub>2</sub> commercial dispersion                                                                      | LIG                                  | Supercapacitor electrodes           | MoS <sub>2</sub> spin-coating onto polyamide followed by laser treatment                       | Supercapacitors                        | Supercapacitors in energy conversion devices                                                                    | 24               |
| MoS <sub>2</sub> hydrothermal prepared                                                                      | LIG                                  | Piezoresistive sensor               | MoS <sub>2</sub> drop-casting onto polyamide followed by laser treatment                       | Strain sensor                          | Sensor to monitor 'deformations' of the skin                                                                    | 26               |
| MoS <sub>2</sub> solvothermal prepared                                                                      | LIG                                  | Gas sensor                          | MoS <sub>2</sub> @rGO drop-casting onto LIG                                                    | NO <sub>2</sub> gas sensor             | NO <sub>2</sub> gas sensing using stretchable devices                                                           | 27               |
| MoS <sub>2</sub> commercial nanoparticles                                                                   | LIG from Poly (amic acid)            | Supercapacitor electrodes           | MoS <sub>2</sub> nanoparticles and Poly (amic acid) film formation followed by laser treatment | Flexible in-plane micro-supercapacitor | In series and in parallel interdigital electrodes for energy conversion devices.                                | 25               |
| MoS <sub>2</sub> sonochemical dispersion                                                                    | LIG                                  | Gas sensor                          | MoS <sub>2</sub> solution sprayed onto LIG                                                     | NO <sub>2</sub> gas sensor             | NO <sub>2</sub> self-alarm                                                                                      | 28               |
| MoS <sub>2</sub><br>WS <sub>2</sub><br>MoSe <sub>2</sub><br>WSe <sub>2</sub><br>Exfoliated in water via LPE | Laser-induced reduced graphene oxide | Electrochemical paper-based sensors | rGO/MX <sub>2</sub> heterostructures assembling induced by laser                               | Electrochemical sensing                | Determination of dopamine, catechin, and H <sub>2</sub> O <sub>2</sub> in different food and biological samples | <b>This work</b> |
